# Supplementary material
Source: Springer Nature journal article supplement (https://www.springermedizin.de/resource/supplementary/12891_2012_1637_MOESM2_ESM.pdf/9508144)

**A**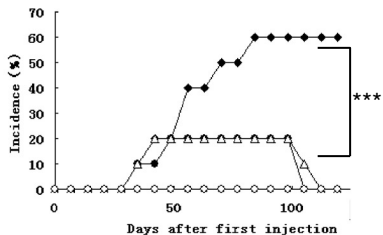**B**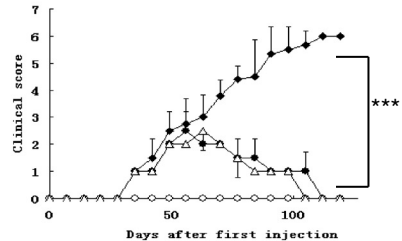**C**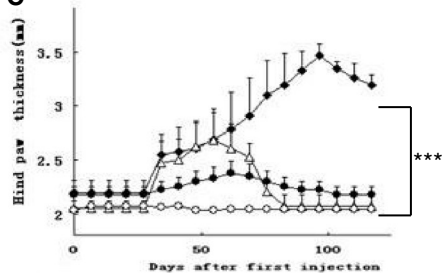**D**

CA1-Tg mice with collagen injection on the 35th day

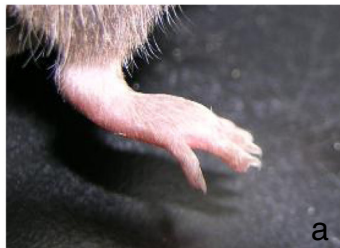

CA1-Tg mice with collagen injection on the 77th day

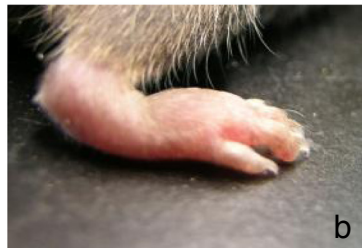

CA1-Tg mice with collagen injection on the 92nd day

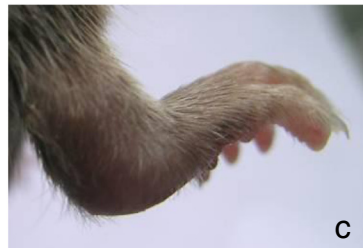

CA1-Tg mice with BSA treatment

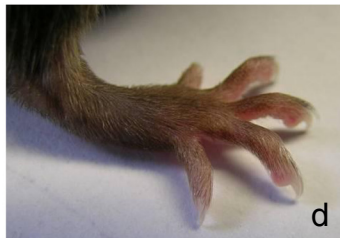

PADI4-Tg mice with collagen injection

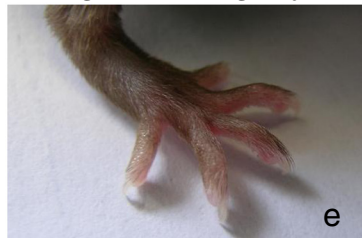

wide-type mice with collagen injection

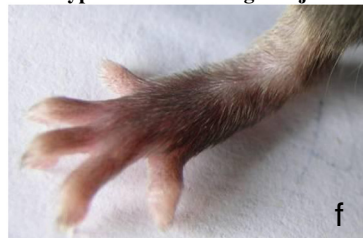

Supplement: MOESM2 [file 9508144]
